# Supplementary material for: Synthesis of SrTiO3 submicron cubes with simultaneous and competitive photocatalytic activity for H2O splitting and CO2 reduction
Source: Royal Society of Chemistry journal article supplement (doi:10.1039/d0ra08246e), 2020-01-01
Supplement: d0ra08246e1.pdf [file d0ra08246e1.pdf]

# Synthesis of SrTiO<sub>3</sub> submicro cubes with simultaneous and competitive photocatalytic activity for H<sub>2</sub>O splitting and CO<sub>2</sub> reduction

Haoshan Wei<sup>a,b</sup>, Jingyi Cai<sup>a,b</sup>, Yong Zhang<sup>\*a,b</sup>, Xueru Zhang<sup>c</sup>, Elena Baranova<sup>d,e</sup>, Jiewu Cui<sup>a,b</sup>, Yan Wang<sup>a,b</sup>, Xia Shu<sup>a,b</sup>, Yongqiang Qin<sup>a,b</sup>, Jiaqin Liu<sup>b,f</sup>, Yucheng Wu<sup>\*a,b</sup>,

<sup>a</sup> School of Materials Science and Engineering, Hefei University of Technology, Hefei 230009, Anhui, China.

<sup>b</sup> Key Laboratory of Advanced Functional Materials and Devices of Anhui Province, Hefei 230009, Anhui, China

<sup>c</sup> Instrumental Analysis Center, Hefei University of Technology, Hefei 230009, China

<sup>d</sup> China International S&T Cooperation Base for Advanced Energy and Environmental Materials, Hefei 230009, Anhui, China

<sup>e</sup> Department of Chemical and Biological Engineering, University of Ottawa, 161 Louis-Pasteur (A-609), Ottawa, ON K1N 6N5, Canada

<sup>f</sup> Institute of Industry & Equipment Technology, Hefei University of Technology, Hefei 230009, Anhui, China

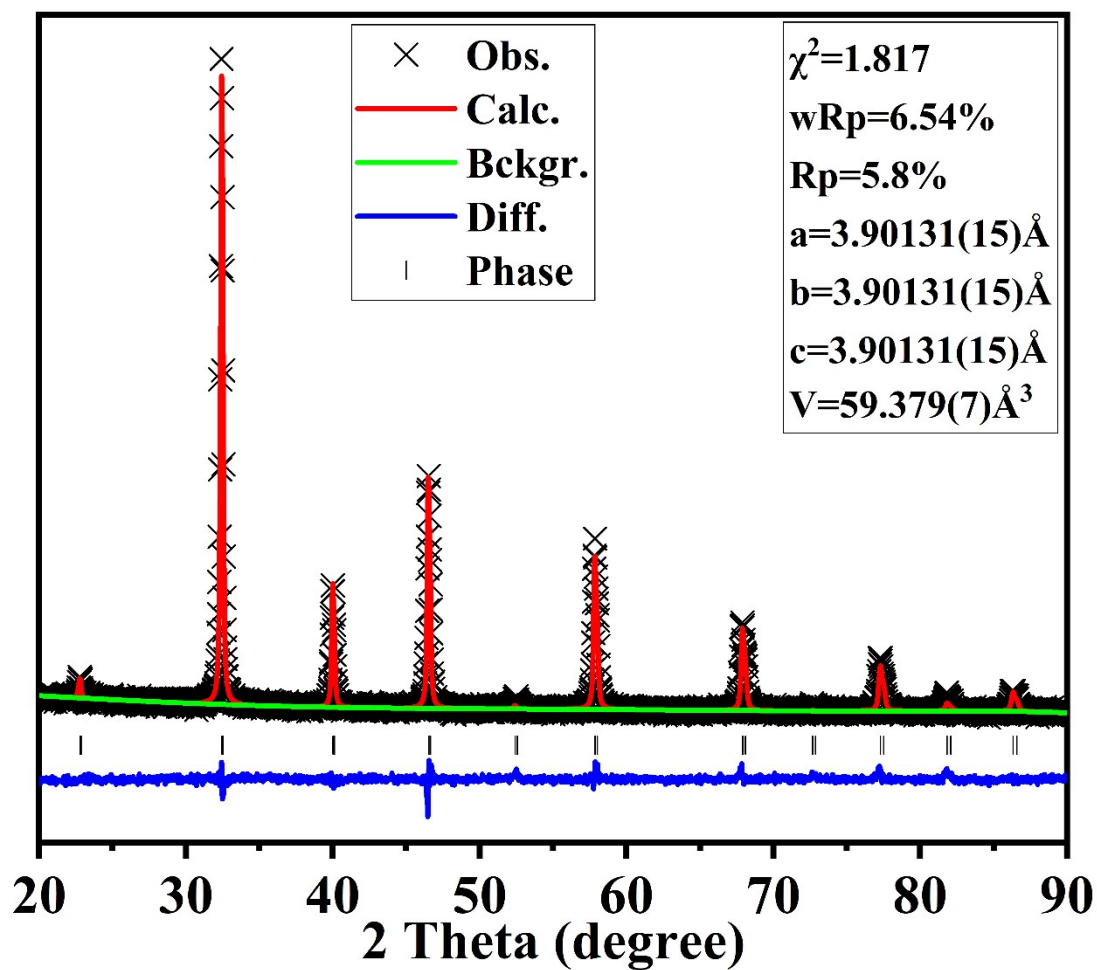

Fig. S1 XRD Rietveld refinement (wRp = 6.54%, Rp = 5.8%,  $\chi^2=1.817$ ) of the as-prepared SrTiO<sub>3</sub> synthesized by molten salt method.

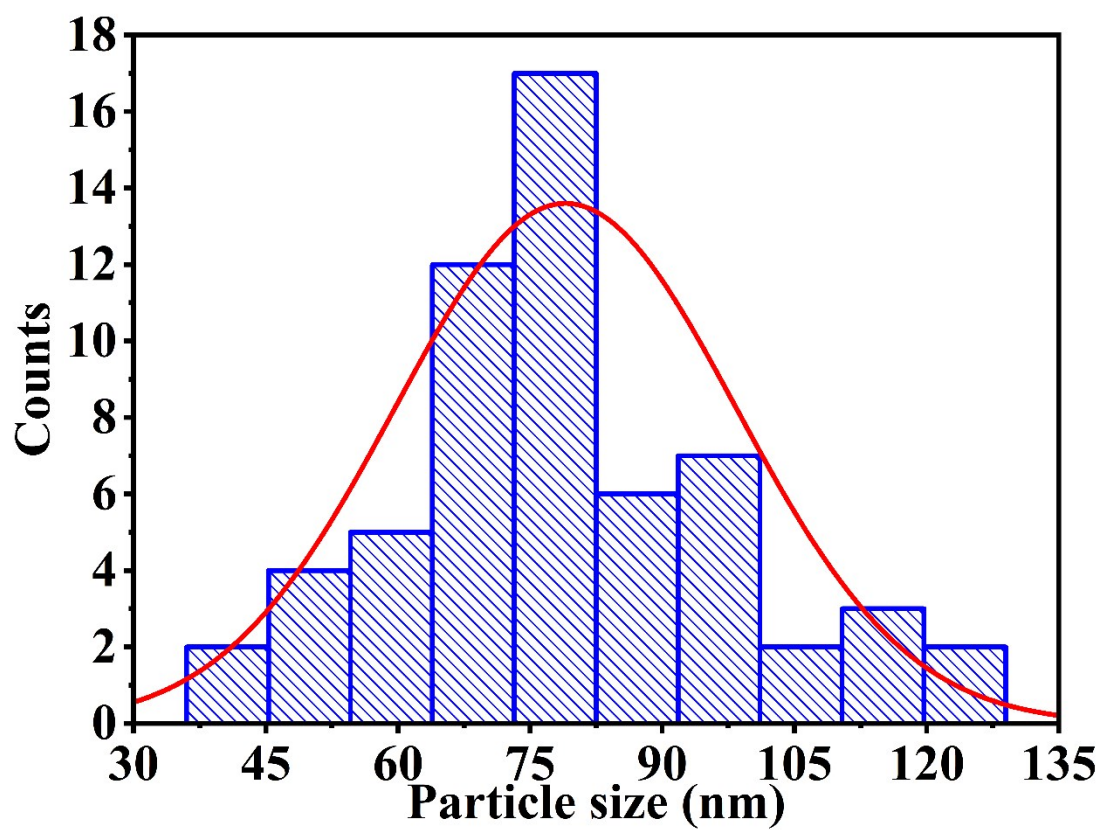

Fig. S2 Particle size distribution diagram of the prepared sample.

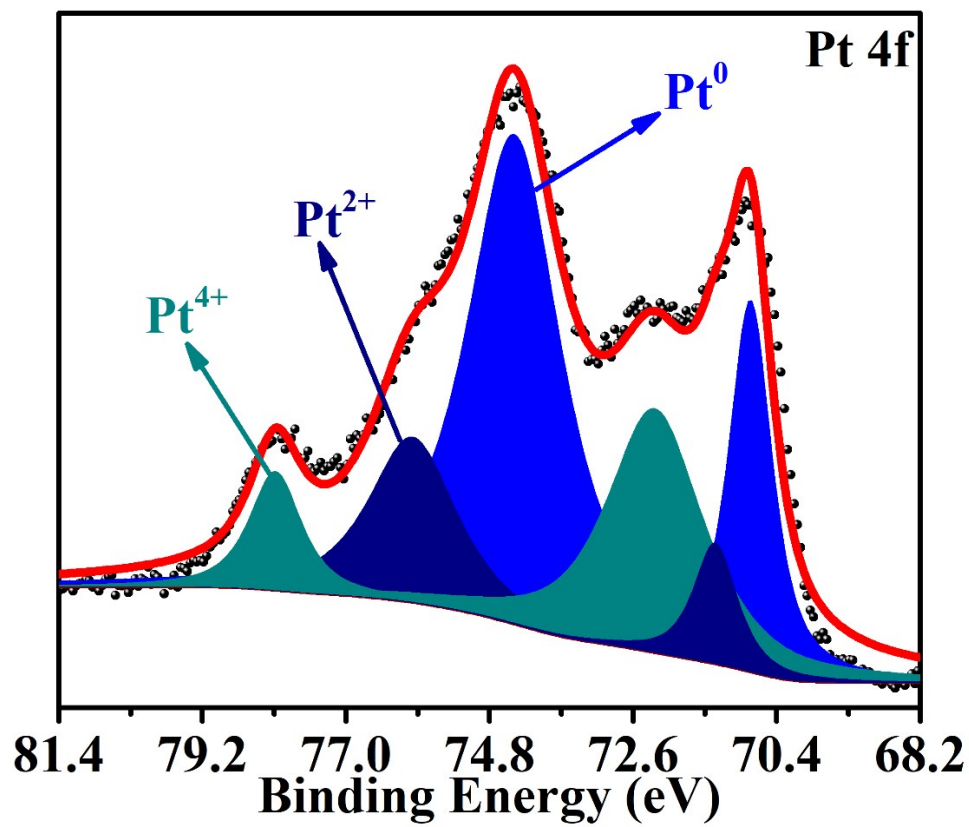

Fig. S3 High resolution XPS patterns of loaded Pt.

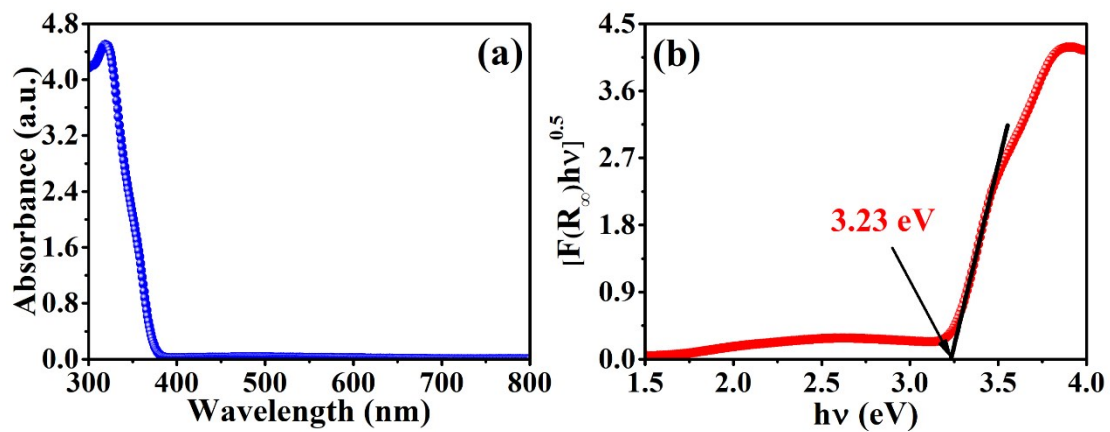

**Fig. S4** (a) UV-vis spectra of the SrTiO<sub>3</sub> sample (b) Tauc plots for the determination of optical band gap for SrTiO<sub>3</sub>

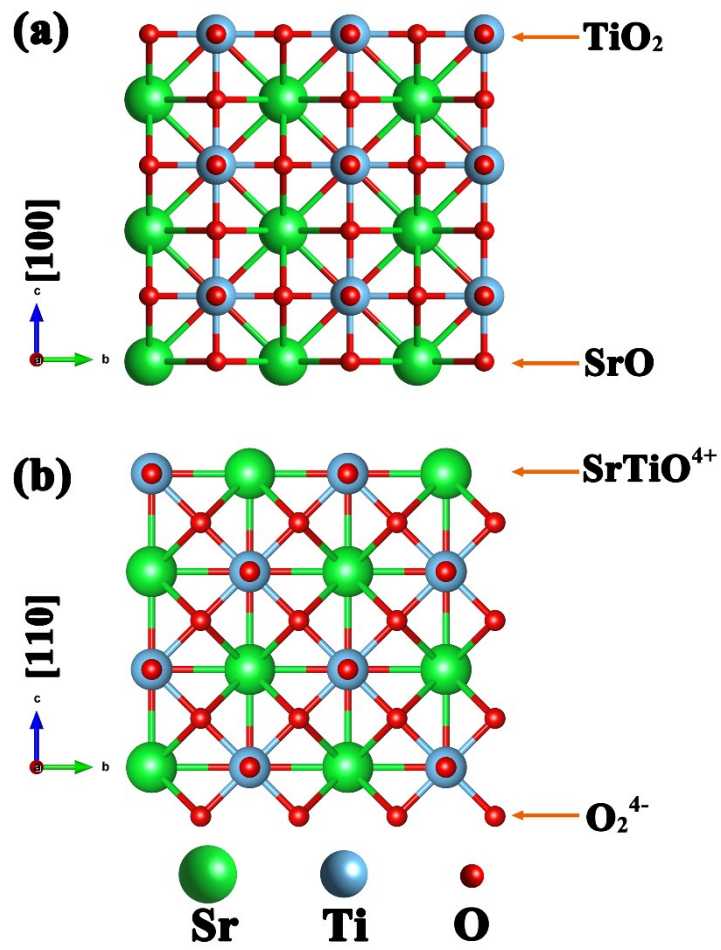

Fig. S5 (a) The terminal plane of (100) facet of SrTiO<sub>3</sub>; (b) The terminal plane of (110) facet of SrTiO<sub>3</sub>.

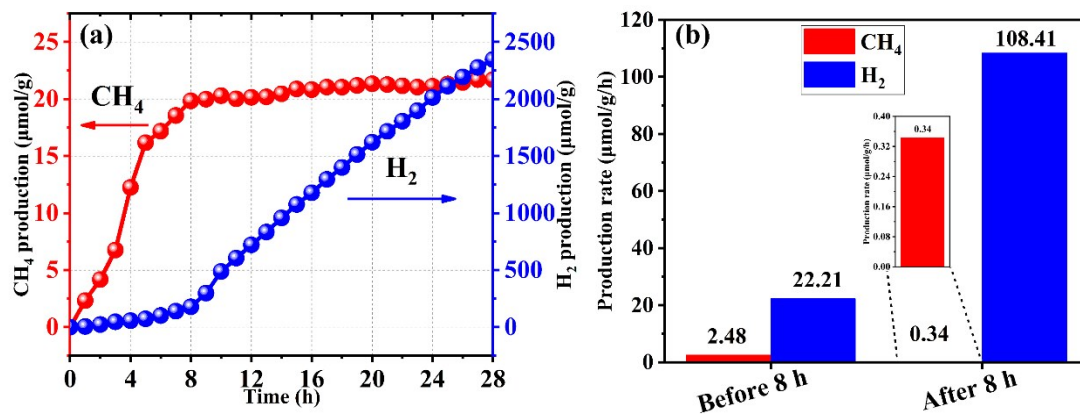

**Fig. S6** (a) Photocatalytic reduction of  $\text{CO}_2$  of the third repetitive test over STO-Pt under simulated sunlight with 20% volume ratio of triethanolamine (TEOA) as sacrificial agent, (b) Production rate change before and after eighth hour of the third repetitive test.

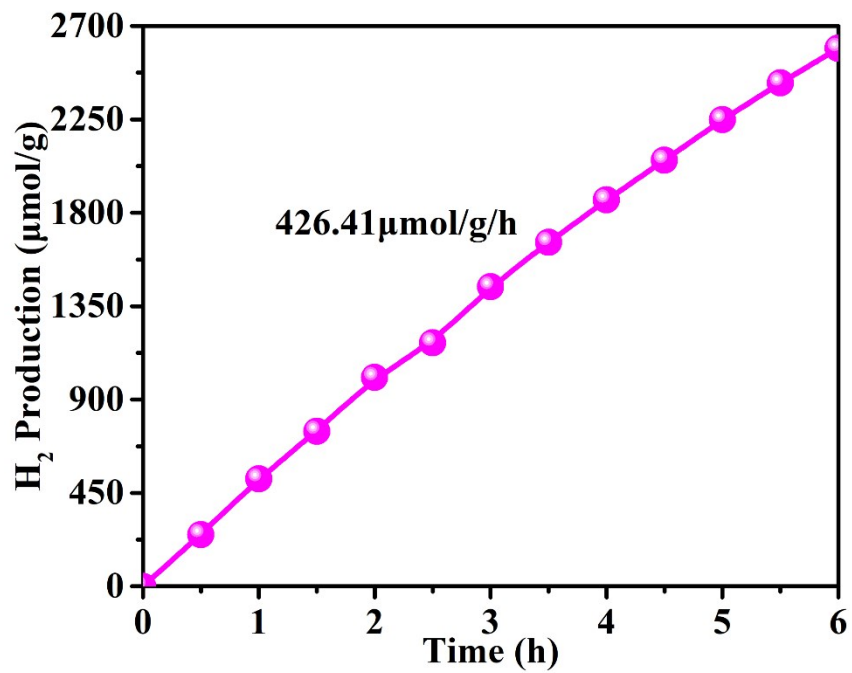

**Fig. S7** Photocatalytic water splitting performance of SrTiO<sub>3</sub> with 3 wt% Pt under Simulated sunlight with twenty percent volume ratio triethanolamine (TEOA) as sacrificial agent.



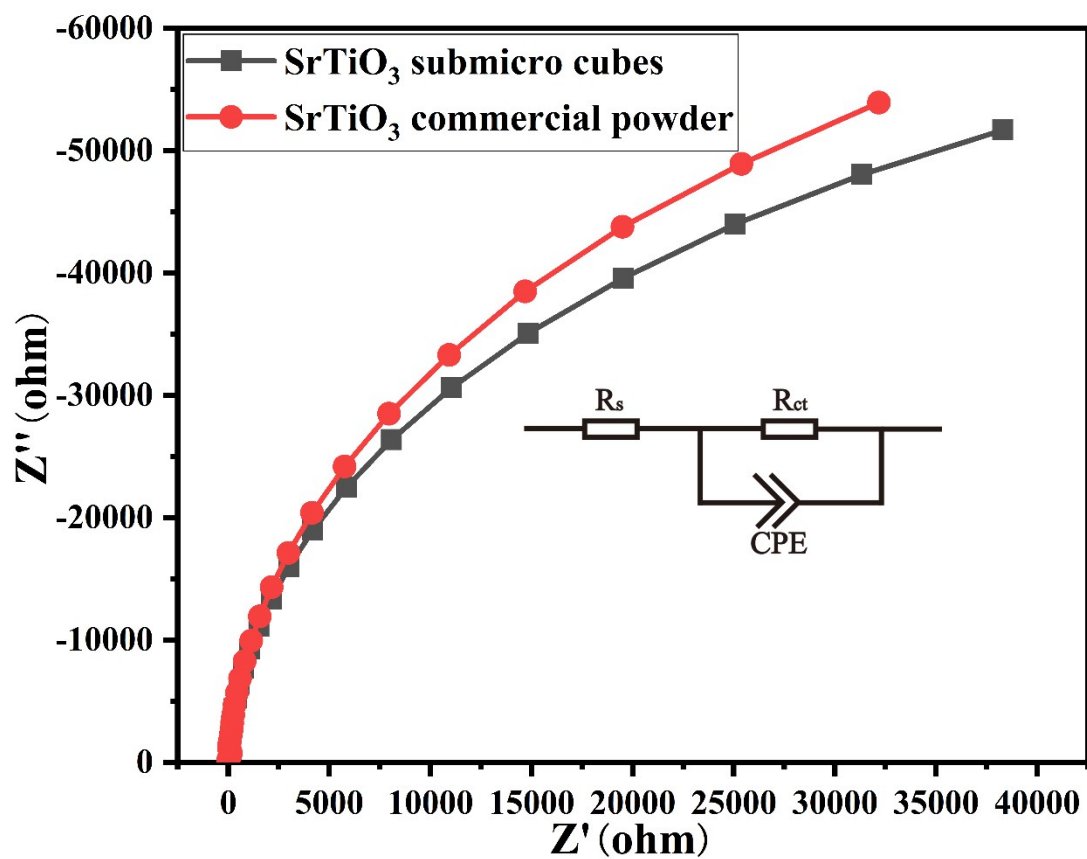

Fig. S8 Nyquist plots of different catalysts in 0.5 mol L<sup>-1</sup> Na<sub>2</sub>SO<sub>4</sub> electrolyte.

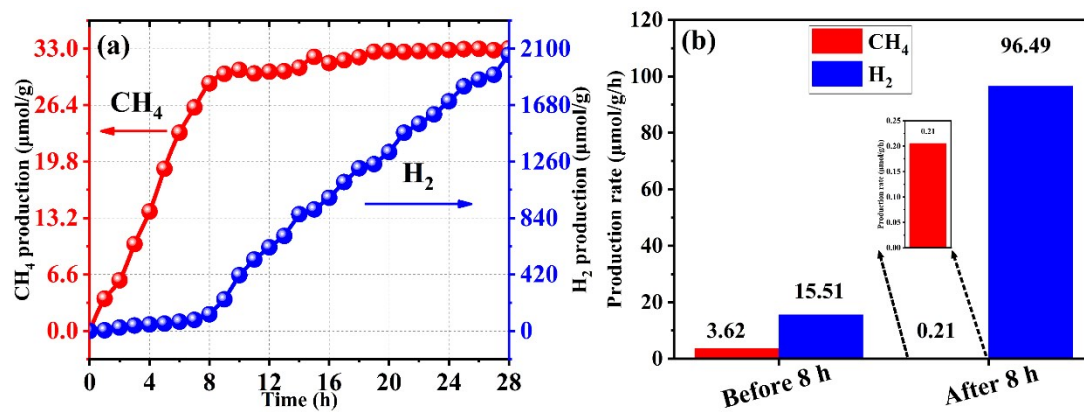

**Fig. S9** (a) Photocatalytic reduction of CO<sub>2</sub> over STO-Pt under simulated sunlight with 10% volume ratio of triethanolamine (TEOA) as sacrificial agent, (b) Production rate change before and after eighth hour.

**Table S1.** Comparison of photocatalytic CO<sub>2</sub> reduction and H<sub>2</sub>O splitting performance over other Ti-based perovskite photocatalysts.

| samples                      | cocatalyst   | catalyst quantity <sup>a</sup> | light source                   | reaction solution                      | CH <sub>4</sub> rate <sup>b</sup> | H <sub>2</sub> rate <sup>b</sup> | refs            |
|------------------------------|--------------|--------------------------------|--------------------------------|----------------------------------------|-----------------------------------|----------------------------------|-----------------|
| SrTiO <sub>3</sub>           | Pt (3.0 wt%) | 50/100                         | 300 W X L                      | TEOA (20%)                             | 4.39/0.46                         | 14.52/120.23                     | this work       |
| SrTiO <sub>3</sub>           | Pt (3.0 wt%) | 50/100                         | 300 W X L                      | TEOA (20%)                             | -----                             | 426.41                           | this work       |
| SrTiO <sub>3</sub>           | -----        | 100/25                         | 300 W X L                      | methanol (20%)                         | -----                             | 0.31                             | [1]             |
| N, S & Fe-SrTiO <sub>3</sub> | -----        | 400/400                        | 77 W Hg lamp                   | 0.2 mol L <sup>-1</sup> NaOH           | 0.16                              | 1.7                              | [2]             |
| SrTiO <sub>3</sub> /ZnTe     | -----        | 10/150                         | 300 W X L (>420 nm)            | CO <sub>2</sub> , H <sub>2</sub> O gas | 2.38                              | -----                            | [3]             |
| Cr-SrTiO <sub>3</sub>        | -----        | 20/80                          | 300 W X L ( $\lambda$ >420 nm) | CO <sub>2</sub> , H <sub>2</sub> O gas | 0.88                              | -----                            | [4]             |
| BaTiO <sub>3</sub>           | -----        | 200/0.0113                     | 6 Wcm <sup>-2</sup> UV-lamp    | CO <sub>2</sub> , H <sub>2</sub> O gas | 0.82                              | -----                            | [5]             |
| NiTiO <sub>3</sub>           | -----        | 50/10                          | 350 W X L                      | CO <sub>2</sub> (6 bar)                | 12.8                              | -----                            | [6]             |
| P123@ SrTiO <sub>3</sub>     | -----        | 10/100                         | 300 W X L                      | TEOA (20%)                             | -----                             | 402                              | [7]             |
| a:                           | mg/mL;       |                                | b:                             | $\mu$ mol                              |                                   | g <sup>-1</sup>                  | h <sup>-1</sup> |

1. P.-L. Hsieh, G. Naresh, Y.-S. Huang, C.-W. Tsao, Y.-J. Hsu, L.-J. Chen and M. H. Huang, *J. Phys. Chem. C*, 2019, **123**, 13664-13671.
2. V. Jeyalakshmi, R. Mahalakshmy, K. R. Krishnamurthy and B. Viswanathan, *Catal. Today*, 2017, **300**, 152-159.
3. M. F. Ehsan, M. N. Ashiq, F. Bi, Y. Bi, S. Palanisamy and T. He, *RSC Adv.*, 2014, **4**, 48411-48418.
4. Y. Bi, M. F. Ehsan, Y. Huang, J. Jin and T. He, *J. CO<sub>2</sub> Util.*, 2015, **12**, 43-48.
5. B. S. Kwak and M. Kang, *J. Nanosci. Nanotechnol.*, 2017, **17**, 7351-7357.
6. Y. Wang, X. Chen, Q. Wang, Y. Zeng, K. Liao, S. Zhang and Q. Zhong, *Energy*, 2019, **169**, 580-586.
7. L. Zhu, W. Gu, H. Li, W. Zou, H. Liu, Y. Zhang, Q. Wu, Z. Fu and Y. Lu, *Appl. Surf. Sci.*, 2020, **528**, 146837.
